# Supplementary material
Source: PubMed Central journal article supplement (PMC5127772)
Supplement: NIHMS814330-supplement-3.pdf [file NIHMS814330-supplement-3.pdf]

**Supplementary Table 1. Clinical-pathological parameters of 13 ESCC patients**

| Case   | Sex    | Age | pTNM staging | Differentiation (Grade) | Smoking status                | Drinking status                       |
|--------|--------|-----|--------------|-------------------------|-------------------------------|---------------------------------------|
| ESCC01 | Female | 66  | pT3N0M0      | Low (G3)                | Never                         | Never                                 |
| ESCC02 | Female | 76  | pT3N1M0      | Middle/Low (G2/G3)      | Never                         | Never                                 |
| ESCC03 | Female | 72  | pT2N1M0      | Middle (G2)             | Never                         | Never                                 |
| ESCC04 | Male   | 66  | pT3N0M0      | High (G1)               | Heavy ( $\geq 40$ pack years) | Occasional                            |
| ESCC05 | Male   | 30  | pT2N1M0      | Middle/Low (G2/G3)      | Never                         | Never                                 |
| ESCC06 | Female | 60  | pT1bN1M0     | Middle (G2)             | Never                         | Never                                 |
| ESCC07 | Male   | 52  | pT3N2M0      | Middle (G2)             | NA                            | NA                                    |
| ESCC08 | Male   | 69  | pT3N1M0      | Low (G3)                | Heavy ( $\geq 40$ pack years) | Everyday (500 ml/day, about 40 years) |
| ESCC09 | Male   | 70  | pT3N0M0      | Middle (G2)             | Moderate (20-40 pack years)   | Regular (250 ml/time, about 40 years) |
| ESCC10 | Male   | 51  | pT2N1M0      | Middle (G2)             | Moderate (20-40 pack years)   | Regular (100 ml/time, about 20 years) |
| ESCC11 | Male   | 71  | pT3N1M0      | Middle (G2)             | Heavy ( $\geq 40$ pack years) | Everyday (250 ml/day, about 40 years) |
| ESCC12 | Male   | 42  | pT2N0M0      | Low (G3)                | Heavy ( $\geq 40$ pack years) | Regular (500 ml/time, about 5 years)  |
| ESCC13 | Female | 71  | pT3N2M0      | Low (G3)                | Never                         | Never                                 |

**Supplementary Table 5. Within-patient versus within-region mutational rate**

| Case                      | Number of mutations in patient (n = 13) | Number of mutations in regions (n = 51) |     |     |     |
|---------------------------|-----------------------------------------|-----------------------------------------|-----|-----|-----|
|                           |                                         | T1                                      | T2  | T3  | T4  |
| ESCC01                    | 241                                     | 189                                     | 192 | 206 | 206 |
| ESCC02                    | 87                                      | 84                                      | 82  | 86  | 83  |
| ESCC03                    | 279                                     | 155                                     | 224 | 217 | 213 |
| ESCC04                    | 109                                     | 88                                      | 87  | NA  | 85  |
| ESCC05                    | 84                                      | 58                                      | 58  | 57  | 60  |
| ESCC06                    | 208                                     | 195                                     | 194 | 192 | 190 |
| ESCC07                    | 170                                     | 150                                     | 155 | 120 | 134 |
| ESCC08                    | 147                                     | 123                                     | 82  | 119 | 121 |
| ESCC09                    | 196                                     | 153                                     | 154 | 145 | 156 |
| ESCC10                    | 117                                     | 106                                     | 103 | 100 | 102 |
| ESCC11                    | 148                                     | 127                                     | 111 | 113 | 123 |
| ESCC12                    | 98                                      | 70                                      | 84  | 84  | 84  |
| ESCC13                    | 294                                     | 280                                     | 289 | 281 | 234 |
| Total number of mutations | 2,178                                   | 7,104                                   |     |     |     |
| Mutational rate           | 168 (2,178/13)                          | 139 (7,104/51)                          |     |     |     |

**Supplementary Table 7. Immune cell fractions estimated from methylation profiles**

| Case   | Region | Immune cell fractions |
|--------|--------|-----------------------|
| ESCC01 | T1     | 1.1%                  |
|        | T2     | 5.4%                  |
|        | T3     | 14.1%                 |
|        | T4     | 7.8%                  |
| ESCC03 | T1     | 24.0%                 |
|        | T2     | 1.4%                  |
|        | T3     | 25.4%                 |
|        | T4     | 29.8%                 |
| ESCC05 | T1     | 31.4%                 |
|        | T2     | 37.4%                 |
|        | T3     | 23.0%                 |
|        | T4     | 38.0%                 |
